# Supplementary material for: Enhanced NK-92 Cytotoxicity by CRISPR Genome Engineering Using Cas9 Ribonucleoproteins
Source: Front Immunol. 2020 May 22;11:1008. doi: 10.3389/fimmu.2020.01008 (PMC7256201; doi:10.3389/fimmu.2020.01008)
Supplement: Table S2 — sgRNA list and gene editing efficiencies. [file Table_2.XLSX]

## Sheet: 工作表1
Gene	sgRNA #	Exon	guide sequence(5'-3')	PAM	top oligo sequence for IVT template assembly	mean % indel	SD
CD96	1	2	CGTGCAGATGCAATGGTCCA	AGG	TAATACGACTCACTATAGGTGCAGATGCAATGGTCCAGTTTTAGAGCTATGCTGGAAACAGCATAGCAAGTTAAA	71.3333	1.52753
CD96	2	2	GCTGTCTATCATCCCCAATA	CGG	TAATACGACTCACTATAGCTGTCTATCATCCCCAATAGTTTTAGAGCTATGCTGGAAACAGCATAGCAAGTTAAA	65	1
CD96	3	2	ACGGCTTCTACTGTGCCTAT	GGG	TAATACGACTCACTATAGCGGCTTCTACTGTGCCTATGTTTTAGAGCTATGCTGGAAACAGCATAGCAAGTTAAA	53.3333	7.37111
KLRC1	4	3	GGTCTGAGTAGATTACTCCT	TGG	TAATACGACTCACTATAGGTCTGAGTAGATTACTCCTGTTTTAGAGCTATGCTGGAAACAGCATAGCAAGTTAAA	84	1
KLRC1	5	3	TGAACAGGAAATAACCTATG	CGG	TAATACGACTCACTATAGGAACAGGAAATAACCTATGGTTTTAGAGCTATGCTGGAAACAGCATAGCAAGTTAAA	84	2.64575
KLRC1	6	3	TTGAAGGTTTAATTCCGCAT	AGG	TAATACGACTCACTATAGTGAAGGTTTAATTCCGCATGTTTTAGAGCTATGCTGGAAACAGCATAGCAAGTTAAA	18	4.58258
TIGIT	7	2	TCCTCCTGATCTGGGCCCAG	GGG	TAATACGACTCACTATAGCCTCCTGATCTGGGCCCAGGTTTTAGAGCTATGCTGGAAACAGCATAGCAAGTTAAA	53.3333	3.51188
TIGIT	8	2	CAGGCCTTACCTGAGGCGAG	GGG	TAATACGACTCACTATAGAGGCCTTACCTGAGGCGAGGTTTTAGAGCTATGCTGGAAACAGCATAGCAAGTTAAA	42.3333	8.14453
TIGIT	9	2	TGGGTTTCAGGCCTTACCTG	AGG	TAATACGACTCACTATAGGGGTTTCAGGCCTTACCTGGTTTTAGAGCTATGCTGGAAACAGCATAGCAAGTTAAA	11	2.64575
TIGIT	10	3	GACCTGGGTCACTTGTGCCG	TGG	TAATACGACTCACTATAGACCTGGGTCACTTGTGCCGGTTTTAGAGCTATGCTGGAAACAGCATAGCAAGTTAAA	4.5	3.35112
TIGIT	11	3	CCCATCCTTCAAGGATCGAG	TGG	TAATACGACTCACTATAGCCATCCTTCAAGGATCGAGGTTTTAGAGCTATGCTGGAAACAGCATAGCAAGTTAAA	5.66667	4.02658
TIGIT	12	3	GCTGACCGTGAACGATACAG	GGG	TAATACGACTCACTATAGCTGACCGTGAACGATACAGGTTTTAGAGCTATGCTGGAAACAGCATAGCAAGTTAAA	5.03333	5.19647
SIGLEC7	13	1	AGGACAGAAGAGTAACCGGA	AGG	TAATACGACTCACTATAGGGACAGAAGAGTAACCGGAGTTTTAGAGCTATGCTGGAAACAGCATAGCAAGTTAAA	60	2
SIGLEC7	14	1	AGTTCCGTGACCGTGCAAGA	GGG	TAATACGACTCACTATAGGTTCCGTGACCGTGCAAGAGTTTTAGAGCTATGCTGGAAACAGCATAGCAAGTTAAA	6	3.4641
SIGLEC7	15	1	CTGCTCCTTCTCCTACCCAG	TGG	TAATACGACTCACTATAGTGCTCCTTCTCCTACCCAGGTTTTAGAGCTATGCTGGAAACAGCATAGCAAGTTAAA	18.6667	2.51661
FCGR3A	16	1	ACCATAGAACAGGACCAGGA	AGG	TAATACGACTCACTATAGCCATAGAACAGGACCAGGAGTTTTAGAGCTATGCTGGAAACAGCATAGCAAGTTAAA	32	18.2
FCGR3A	17	1	TTTCAAGAAAAGGAAATTGG	TGG	TAATACGACTCACTATAGTTCAAGAAAAGGAAATTGGGTTTTAGAGCTATGCTGGAAACAGCATAGCAAGTTAAA	27.7	2.6
FCGR3A	18	1	TGGTGGGTGACAGAGATGGG	TGG	TAATACGACTCACTATAGGGTGGGTGACAGAGATGGGGTTTTAGAGCTATGCTGGAAACAGCATAGCAAGTTAAA	24.7	1.7
FCGR3A	19	1	AGAGATGGGTGGAGGGGCTG	GGG	TAATACGACTCACTATAGGAGATGGGTGGAGGGGCTGGTTTTAGAGCTATGCTGGAAACAGCATAGCAAGTTAAA	20.7	1.2
CD226	20	2	ATCTCTGGAAACTGTTTGAA	AGG	TAATACGACTCACTATAGTCTCTGGAAACTGTTTGAAGTTTTAGAGCTATGCTGGAAACAGCATAGCAAGTTAAA	7	2.4
CD226	21	2	AAAGTAGGATAATCCATCTC	TGG	TAATACGACTCACTATAGAAGTAGGATAATCCATCTCGTTTTAGAGCTATGCTGGAAACAGCATAGCAAGTTAAA	3	4.2
CD226	22	2	AGAAGAGCCAAAAGTAAAGT	AGG	TAATACGACTCACTATAGAGAAGAGCCAAAAGTAAAGTGTTTTAGAGCTATGCTGGAAACAGCATAGCAAGTTAA	31	3.6
KLRK1	23	4	AATAATGAAACGGATTCCCA	TGG	TAATACGACTCACTATAGAATAATGAAACGGATTCCCAGTTTTAGAGCTATGCTGGAAACAGCATAGCAAGTTAA	52	NA
hROSA26	24	NA	GAAAGGGCCTTTCTAGAGCA	GGG	TAATACGACTCACTATAGAAAGGGCCTTTCTAGAGCAGTTTTAGAGCTATGCTGGAAACAGCATAGCAAGTTAAA	10	4.58258
NCR1	25	3	CCCGGACATGAACTCCCGCA	TGG	TAATACGACTCACTATAGCCCGGACATGAACTCCCGCAGTTTTAGAGCTATGCTGGAAACAGCATAGCAAGTTAA	NA	NA
